# Supplementary material for: Regional health care planning: a methodology to cluster facilities using community utilization patterns
Source: PubMed Central journal article supplement (PMC3766152; doi:10.1186/1472-6963-13-333), 2013-08-22
Supplement: 1472-6963-13-333-S1.pdf [file 1472-6963-13-333-S1.pdf]

```

#####
####                                     ####
#### Additional file 1                                     ####
####                                     ####
#### R code to implement the Thomas Methodology         ####
####                                     ####
#### Citation information (code)                         ####
#### Delamater PL, Shortridge AM, and JP Messina, Regional health ####
#### care planning: a methodology to cluster facilities using ####
#### community utilization patterns. BMC Health Services Research ####
####                                     ####
#### Citation information (original methodology)         ####
#### Thomas JW, Griffith JR, and P Durance, Defining hospital ####
#### clusters and associated service communities in metropolitan ####
#### areas, Socio-Economic Planning Sciences 1981, 15(2):45-51 ####
####                                     ####
#### Max Relevance Algorithm Clustering Algorithm       ####
####                                     ####
#### Requires: Patient visits table (zip -> hospital)  ####
####           Zip population data                     ####
####           Hospital info table                    ####
####           Hospital zip code table                 ####
####                                     ####
#### Interpreted and converted to R code by Paul Delamater and ####
#### Ashton Shortridge during summer, 2011 for the Michigan ####
#### Hospital Bed Standard Advisory Committee working group. ####
#### Funding for this research was provided by the Michigan ####
#### Department of Community Health.                   ####
####                                     ####
#####

#####
##                                     ##
## Get input data                                     ##
##                                     ##
#####

#####
## Read patient visits data
#####

#### Note: pv is a table with hospitals in rows and zip codes
####         in columns. Hospital identifier column should be
####         labeled "HOSP_ID". Zip code column labels should
####         be the five digit zip code (e.g., "48823"). Table
####         entries are the number of hospitalizations from
####         residents of each zip code at each hospital.

# Load data
pv <- read.csv("inputdata/hosp.zip.visits.mtx.csv")

# Ensure HOSP_ID in character format
pv$HOSP_ID <- as.character(pv$HOSP_ID)

# Remove characters from column names
# R adds an "X" to the zip code number
# Assumes all zip codes are 5 digits
names(pv)[2:ncol(pv)] <- substr(as.character(names(pv)[2:ncol(pv)]), 2, 6)

#####

```

```

## Convert number of visits to proportions (Relevance Index)
#####

# Define variable for last zip code column
n.zip <- ncol(pv)

# Sum hospital visits for each zip code
# Assumes HOSP_ID is first column
zip.visits <- colSums(pv[,2:n.zip])

# Divide each entry by summed visits to create Rij values
pv[,2:n.zip] <- pv[,2:n.zip] / rep(zip.visits, each = nrow(pv))

#####
## Read hospital attributes data
#####

#### Note: hosp.info is a table with hospitals in rows and
#### attributes in columns. In this case, the column
#### that corresponds to the patient records is "MIDB".

# Load data
hosp.info <- read.csv("inputdata/hospitals.csv")

#### Note: hosp.HAU is a table with hospitals in rows and
#### attributes in columns. In this case, the column
#### that corresponds to the patient records is "MIDB".
#### Home Areal Unit is "ZIP".

# Load home areal unit (zip code) of each hospital
hosp.HAU <- read.csv("inputdata/hospital.zipcodes.csv")

# Attach to home areal unit to patient records
pv <- merge(pv, hosp.HAU, by.x="HOSP_ID", by.y="MIDB", all.x=TRUE)

# Change column name
names(pv)[ncol(pv)] <- "HAU"

# Add column with Rij (Relevance Index) of each hospital in
# its own home areal unit
for (h in 1:nrow(pv)) pv$RiHAU[h] <- pv[h,which(names(pv)==pv$HAU[h])]

#####
## Get zip code population data
#####

#### Note: zip pop is a table with the zip code name in a
#### column, "ZIP" and the population of the zip code
#### in a column, "POP"

# Load data
zip.pop <- read.csv("inputdata/zipcode.population.csv")

#####
## Code to implement Thomas Methodology
##
#####

#####

```

```

## Prepare data and create data holders
#####

# Add column with initial alpha values (all are set at 0.02)
# In an update of this code, initial alpha values are set at 0.05
pv$alpha <- 0.02

# Define initial values for alpha variables
alpha.1 <- 0.02
alpha.2 <- 0.125

# Add binary holder column for individuals / groups
pv$Group <- 0
# Add column to hold hospital names after clustering
pv$GrNames <- pv$HOSP_ID

#####
## Calculate population weighted relevance index, Rj
#####

#### Note: Pi = population of areal unit i
####       Rij = relevance index values for areal unit i
####       to hospital j

# Calculate PiRij values (Pi * Rij)
PiRij.matrix <- pv
PiRij.matrix[,2:n.zip] <- PiRij.matrix[,2:n.zip] * rep(zip.pop$POP, each =
  nrow(PiRij.matrix))

# Create holder for Rj values
Rj.all <- NULL

# Create holder for Ij zip codes
Ij.matrix <- pv
Ij.matrix[,2:n.zip] <- 0

# Calculate Rj for each hospital
for (j in 1:nrow(pv)) {

  # Get hospital j's Ri values
  hosp.j <- pv[j,2:n.zip]

  #### Note: From Thomas et al., Ij = set of areal units
  ####       for which individual relevance values of
  ####       hospital j exceeds or equals alpha

  # Find zip codes with Rij greater than alpha
  Ij.list <- which(hosp.j >= alpha.1)+1

  # Write zip codes greater than alpha to Ij holder
  Ij.matrix[j,c(Ij.list)] <- 1

  # If no areal units in Ij, Rj value is zero
  if (length(Ij.list) == 0) {

    # Write hospital ID and 0 to Rj holder
    Rj.all <- rbind(Rj.all, cbind(as.character(pv$HOSP_ID[j]), 0))

  } else {

# Get list of zip code names

```

```

Ij.zips <- names(pv)[Ij.list]

# Get numerator value for Rj
PiRij <- sum(PiRij.matrix[j,Ij.list])

# Get denominator value for Rj (total zip code population)
Pi <- sum(zip.pop$POP[c(Ij.list-1)])

#### Note: Rj = sum(Pi(dij/Di)) / sum(Pi)
####       where dij/Di is Relevance Index

# Calculate Rj (population weighted relevance index)
Rj <- PiRij / Pi

# Put in holder
Rj.all <- rbind(Rj.all, cbind(as.character(pv$HOSP_ID[j]), Rj))

}

}

# Make Rj.all into dataframe
Rj.all <- as.data.frame(Rj.all)

# Rename columns in Rj.all
names(Rj.all) <- c("HOSP_ID", "Rj")

# Convert from factor to numeric and character
Rj.all$Rj <- as.numeric(levels(Rj.all$Rj)[Rj.all$Rj])
Rj.all$HOSP_ID <- as.character(Rj.all$HOSP_ID)

#####
## Remove hospitals with Rj of 0 from analysis
## These hospitals are ungroupable using the method
#####

# Locate hospitals with Rj = 0
zeros <- which(Rj.all$Rj == 0)

# Get hospital ID
Ungroupable.hospitals <- Rj.all[c(zeros),1]

# Remove hospitals from matrices
pv <- pv[-c(zeros),]
Rj.all <- Rj.all[-c(zeros),]
Ij.matrix <- Ij.matrix[-c(zeros),]
PiRij.matrix <- PiRij.matrix[-c(zeros),]

# Write ungroupable hospitals info to table
Ungroupable.hospitals.info <- hosp.info[hosp.info$MIDB %in% Ungroupable.hospitals, ]

#####
## Start iterative process part of the code and explicitly
## state which method will be used to STOP the process
#####

# Create holder for grouped hospitals
Grouped.Hospitals <- NULL

# Create holder for temporary Rj.min values
Rj.temp <- NULL

```

```

#### Note: From Thomas et al., The procedure terminates
#### when one of three conditions occurs: (1) all
#### hospitals have been aggregated into a single
#### large cluster; (2) a user-specified number of
#### iterations has been completed; or (3) all
#### identified clusters are stable, i.e., no
#### cluster serves more than alpha of the patients
#### in the home areal unit of any other cluster.
####
#### These lines will make the iterative process stop
#### at a specified number of Subareas, similar to
#### option number (2) above. To choose this option
#### uncomment the following lines and comment out,
#### "run <- 1" and "while (run == 1) {"

# Select desired number of Subareas
# n.subareas <- 64
# Start grouping hospitals
# while (nrow(pv) > n.subareas) {

#### These lines will make the iterative process stop
#### when no hospital/group has greater than alpha
#### of any other hospitals/group's home area (option
#### number (3) above). These line also stops code if
#### all hospitals are aggregated into one large
#### group (option number (1) above).

# Create variable used in the iterative process for stopping
run <- 1

# Start grouping hospitals
while (run == 1) {

#####
## Find hospital with minimum Rj
#####

#### Note: Checks for hospitals in a temporary holder. This
#### holder is defined below. It is used in case any
#### hospital is the min Rj, but does not have another
#### hospital to group with yet

if (length(Rj.temp) == 0) {

# Locate hospital with minimum Rj value
which.hosps <- which(Rj.all$Rj == min(Rj.all$Rj))

# Get number of "minimum" Rj hosps
n.min.hosps <- length(which.hosps)

} else {

# Locate hospital with minimum Rj value (minus temp)
which.hosps <- which(Rj.all$Rj == min(Rj.all$Rj[-Rj.temp]))

# Get number of "minimum" Rj hosps to determine if ties exist
n.min.hosps <- length(which.hosps)

}

# If a tie exists, randomly select which of the hospitals is

```

```

# is selected for aggregation. Otherwise min.hosp is used
if (n.min.hosps > 1) {

  # Create random variable using number of tied hospitals
  min.hosp <- round((n.min.hosps-1)*runif(1))+1

  # Select hospital using random variable
  min.hosp <- which.hosps[min.hosp]

} else {

  # Use the single hospital
  min.hosp <- which.hosps

}

# Subset minimum hospital from Rj.all
Rj.min <- Rj.all[min.hosp,]

# Print to screen to display which hospital is selected
print(paste("Rj.min = ", Rj.min[2], ", HOSP_ID = ", Rj.min[1], sep=""))

# Get Rj.min's home areal unit (column number!)
Rj.min.Ij <- which(names(pv) == pv$HAU[min.hosp])

# Print Rj.min's home areal unit and RI
print(paste("Rj.min HAU = ", pv$HAU[min.hosp], ", RI = ", pv[min.hosp, Rj.min.Ij],
  sep=""))

#####
## Find hospital/cluster with max RI in Rj min's home areal unit
#####

#### Note: From Thomas et al., the hospital with the smallest
####       Rj is identified and grouped to form a cluster with
####       the hospital having the greatest individual
####       relevance in hospital j's home areal unit.

# Find max RI in Rj min's home areal unit
Rj.max.Rj.min <- which(pv[,Rj.min.Ij] == max(pv[,Rj.min.Ij]))

# If statement in case it selects itself
# e.g., no hospital or cluster has higher Ri in minimum's
# home area
if (Rj.max.Rj.min == min.hosp) {

  # Pick the next highest after removing min hospital
  next.Rj.max <- max(pv[-min.hosp,Rj.min.Ij])
  Rj.max.Rj.min <- which(pv[,Rj.min.Ij] == next.Rj.max)

}

# In case of ties for Rj.max select randomly from tied hospitals
if (length(Rj.max.Rj.min) > 1) {

  # Generate random number
  rand <- round((length(Rj.max.Rj.min)-1)*runif(1))+1

  # Use random number to select
  Rj.max.Rj.min <- Rj.max.Rj.min[rand]

}

```

```

# Get RI of Rj.max
alpha.Rj.max <- pv[Rj.max.Rj.min, Rj.min.Ij]

# Print alpha value and HOSP ID to screen
print(paste("alpha.Rj.max = ", alpha.Rj.max, ", HOSP_ID = ", pv$HOSP_ID[Rj.max.Rj.min],
  sep=""))

#####
## Big logic part of code. Determines whether to group hospitals
## or move to next minimum hospital in list
#####

#### Note: From Thomas et al., ...the hospital with the smallest
#### Rj is identified and grouped to form a cluster with
#### the hospital having the greatest individual relevance
#### in hospital j's home areal unit.
####
#### We assume that there is a 'cut-off' value in this
#### step based on the text in termination option number
#### (3), i.e., no cluster serves more than alpha of the
#### patients in the home areal unit of any other cluster.

# If the Rj value in Rj.min's home area is larger than the
# alpha cutoff of the hospital or cluster, then cluster
if (alpha.Rj.max >= pv$alpha[Rj.max.Rj.min]) {

  #####
  ## Update RI values to reflect clustering
  #####

  # Sum RI values for clustered hospitals
  pv[Rj.max.Rj.min,2:n.zip] <- pv[Rj.max.Rj.min,2:n.zip] + pv[min.hosp,2:n.zip]

  # Update alpha score and group columns
  pv$alpha[Rj.max.Rj.min] <- alpha.2
  pv$Group[Rj.max.Rj.min] <- 1
  pv$GrNames[Rj.max.Rj.min] <- paste(pv$GrNames[Rj.max.Rj.min], pv$GrNames[min.hosp],
    sep=",")

  #####
  ## Update home areal unit for cluster
  #####

  #### Note: From Thomas et al., When a previously formed cluster
  #### j* is identified for further clustering, its home
  #### areal unit is assumed to be the home areal unit of
  #### the hospital (member of j*) having the highest Rij
  #### among the cluster hospitals' home areas

  # If Rj min's relevance in its home area is larger than Rj max
  # assign new home areal unit to newly formed cluster
  if (pv$RiHAU[Rj.max.Rj.min] < pv$RiHAU[min.hosp]) {

    # Assign Rij to cluster entry
    pv$RiHAU[Rj.max.Rj.min] <- pv$RiHAU[min.hosp]

    # Assign new home areal unit to cluster entry
    pv$HAU[Rj.max.Rj.min] <- pv$HAU[min.hosp]

  }
}

```

```

#####
## Update Ij.matrix to reflect new alpha value of cluster
#####

# Find zip codes above new alpha value
Ij.new <- which(pv[Rj.max.Rj.min,2:n.zip] >= alpha.2)+1

# Clear old Ij row, then write new zip codes to Ij holder
Ij.matrix[Rj.max.Rj.min, 2:n.zip] <- 0
Ij.matrix[Rj.max.Rj.min,c(Ij.new)] <- 1

#####
## Update PiRij.matrix
#####

# Sum PiRij entries
PiRij.matrix[Rj.max.Rj.min,2:n.zip] <- PiRij.matrix[Rj.max.Rj.min,2:n.zip] +
  PiRij.matrix[min.hosp,2:n.zip]

#####
## Update Rj.all with new list of Ij zip codes
#####

# Get numerator value for Rj
n.PiRij <- sum(PiRij.matrix[Rj.max.Rj.min,Ij.new])

# Get denominator value (total zip code population)
n.Pi <- sum(zip.pop$POP[c(Ij.new-1)])

# Calculate Rj (population weighted relevance index)
Rj <- n.PiRij / n.Pi

# Put in holder
Rj.all$Rj[Rj.max.Rj.min] <- Rj

#####
## Remove Rj.min from pv, Ij.matrix, PiRij.matrix, Rj.all
## because it has now been grouped
#####
pv <- pv[-c(min.hosp),]
Ij.matrix <- Ij.matrix[-c(min.hosp),]
PiRij.matrix <- PiRij.matrix[-c(min.hosp),]
Rj.all <- Rj.all[-c(min.hosp),]

# Write Rj.min hosp to holder
Grouped.Hospitals <- c(Grouped.Hospitals, Rj.min$HOSP_ID)

# Print to screen which hospitals have been grouped
print(Grouped.Hospitals)

# Reset Rj.temp because current Rj.min has been grouped
Rj.temp <- NULL

} else {

#####
## Re-run steps with a different Rj.min because aggregation may
## produce clusters with home areas > alpha) in former Rj min's
## home area. So we hold onto this Rj.min and re-check later
## List this Rj.min in holder
#####

```

```

Rj.temp <- c(Rj.temp, min.hosp)

}

# Print to screen which hospitals are in Rj.temp and
# the length of both Rj.temp and Rj.all
print(paste("Rj temp has: ", length(Rj.temp), " hospitals/cluster", sep=""))
print(paste("Rj all has: ", nrow(Rj.all)-1, " hospitals/clusters remaining", sep = ""))

#####
## Determine whether to keep attempting to cluster
## or to terminate the iterative process
#####

# If all the hospitals (-1) are in Rj.temp, then no
# hospital has more than alpha of another's home area
if (length(Rj.temp) == nrow(Rj.all)-1) {
  run <- 0
}

# If all hospitals are grouped Rj.all has one row
if (nrow(Rj.all) == 1) {
  run <- 0
}

}

#####
## Attach Subarea designation to hospital info file
#####

# Get number of Subareas
n.subareas <- dim(pv)[1]

# Make empty holder
subarea.table <- NULL

# Break apart output table from Thomas method
# and insert into holder
for (p in 1:n.subareas) {
  names <- unlist(strsplit(pv$GrNames[p], ","))
  subarea.table <- rbind(subarea.table, cbind(p, names))
}

# Rename column names
colnames(group.table) <- c("Thomas", "MIDB")

# Attach Subarea names to hospital info file
hosp.info <- merge(hosp.info, group.table, by="MIDB", all.x=TRUE)

# Name ungroupable hospitals "NG"
hosp.info$Thomas <- as.character(hosp.info$Thomas)
hosp.info$Thomas[is.na(hosp.info$Thomas)] <- "NG"

```
